# Supplementary material
Source: PubMed Central journal article supplement (PMC4285976)
Supplement: JB.02080-14_zjb999093480so1.pdf [file JB.02080-14_zjb999093480so1.pdf]

## Supplemental Information

### *Conformation of functional r-langerin.*

A truncated form of recombinant human langerin (r-langerin) consisting of the ECD (neck domain and CRD) was produced in *E. coli* as a fusion protein with N-terminal His<sub>6</sub> and FLAG domains and purified by IMAC. Functional r-langerin was obtained by refolding and subsequent mannan-agarose affinity chromatography (1). To assess functionality, Ca<sup>2+</sup> dependent binding of r-langerin to a known ligand (soybean agglutinin) was evaluated in an ELISA based assay. The r-langerin efficiently bound various concentration of agglutinin, and EDTA chelation of Ca<sup>2+</sup> in this assay inhibited the r-langerin-agglutinin interaction (Figure S1A). Additionally, r-langerin binding of agglutinin was abolished by preincubation with mannan, thus demonstrating that the carbohydrate dependence of the r-langerin activity. Langerin was previously shown to bind mannose, and glucose residues of oligosaccharide chains, but not galactose (2). Sugar specificity of the r-langerin was evaluated with an inhibition assay by pretreating the lectin with different sugar moieties. As expected mannan, mannose and glucose reduced the binding of r-langerin to agglutinin by  $71.14 \pm 3.8\%$ ,  $70.2 \pm 2.4\%$ , and  $54.0 \pm 4.4\%$ , respectively. Galactose, however, only weakly inhibited the r-langerin binding activity ( $13.0 \pm 0.83\%$  inhibition) (Figure S1B). These data are consistent with previous sugar specificity studies and demonstrated a functional Ca<sup>2+</sup> dependent trimeric r-langerin construct.

A liquid phase SPR assay was exploited to establish the affinity of agglutinin and a second ligand (yeast invertase) to r-langerin. The r-langerin was immobilized on a sensor chip and exposed to a consistent flow of agglutinin or yeast-invertase at various concentrations (5 to 160 nM). The sensograms shown in Figure S2 demonstrate concentration dependent binding of the ligands. The analysis of SPR data with a steady state affinity model established the equilibrium dissociation constant (K<sub>D</sub>) of yeast invertase and agglutinin as 0.0345 μM and 0.187 μM, respectively. The r-langerin not only demonstrated a greater affinity for yeast invertase, but also increased avidity as demonstrated by the slow dissociation of this ligand compared to agglutinin. It should be noted that r-langerin interactions measured by SPR were completely abolished in the presence of 300 mM methylmannoside and 50 mM EDTA. These data provided a baseline of langerin reactivity that can be used in comparison to langerin binding of potential mycobacterial ligands.

- 1) Stambach, N. S., and Taylor, M. E. (2003) Characterization of carbohydrate recognition by langerin, a C-type lectin of Langerhans cells. *Glycobiology* **13**, 401-410
- 2) Tada, Y., Riedl, E., Lowenthal, M. S., Liotta, L. a., Briner, D. M., Crouch, E. C., and Udey, M. C. (2006) Identification and characterization of endogenous Langerin ligands in murine extracellular matrix. *J. Invest. Dermatol.* **126**, 1549-1558

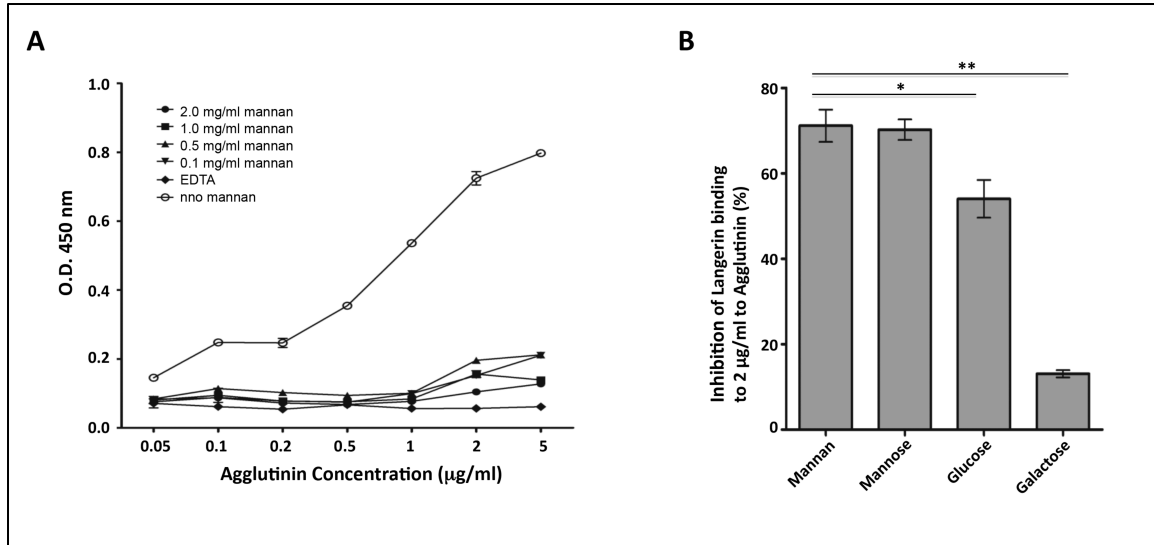

**Figure S1. Confirmation of functionality and specificity of r-langerin.**

A) ELISA based r-langerin binding/inhibition assay. The r-langerin (in the presence of  $\text{CaCl}_2$ ), or r-langerin pretreated with mannann (0.1, 0.5, 1 and 2 mg/ml) or 2mM EDTA was assessed against various concentrations of agglutinin (0.05, 0.1, 0.2, 0.5, 1, 2, and 5  $\mu\text{g/ml}$ ). B) Sugar specificity of r-langerin was measured based on binding to agglutinin in the presence of  $\text{CaCl}_2$  after pretreating the ligand with 100 mM monosaccharide (galactose, glucose or mannose) or 100  $\mu\text{g/ml}$  mannann. A one-way ANOVA combined with Tukey's multiple comparison analysis was performed to evaluate the statistical difference between sugar pretreatments. Error bar indicates SD of three independent r-langerin assays. \*\*,  $p < 0.01$ , \*,  $p < 0.05$ .

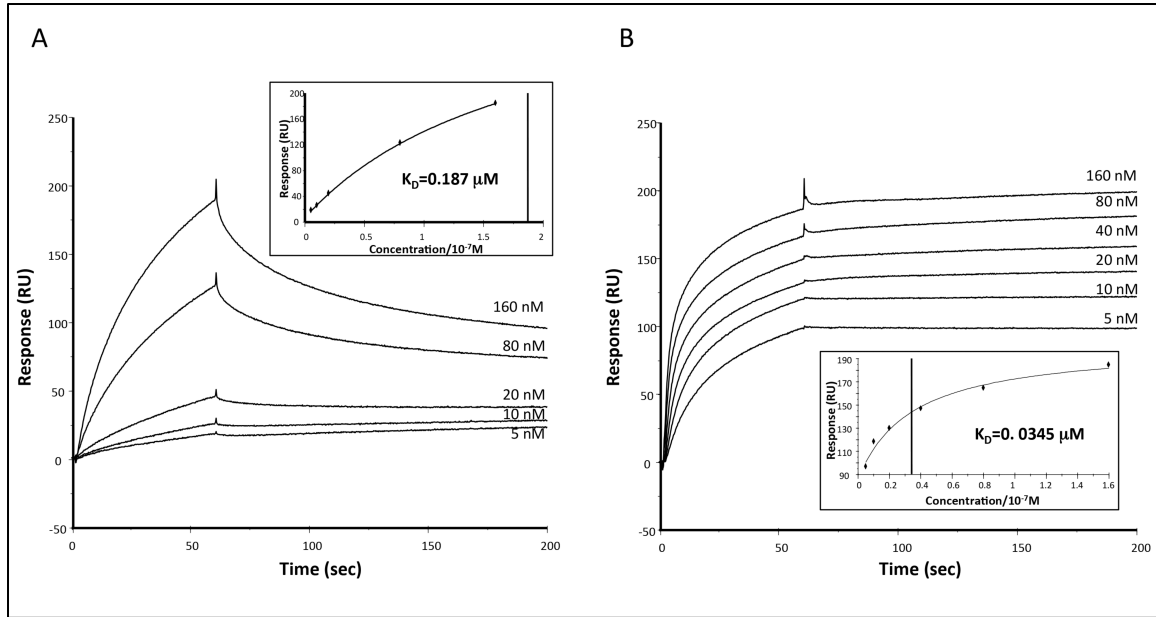

**Figure S2. r-Langerin affinity to agglutinin and yeast invertase.** Sensograms of immobilized r-langerin binding to agglutinin (C) and yeast invertase (D) as measured by SPR. The insets depicted the  $K_D$  values obtained from steady-state affinity measurements.

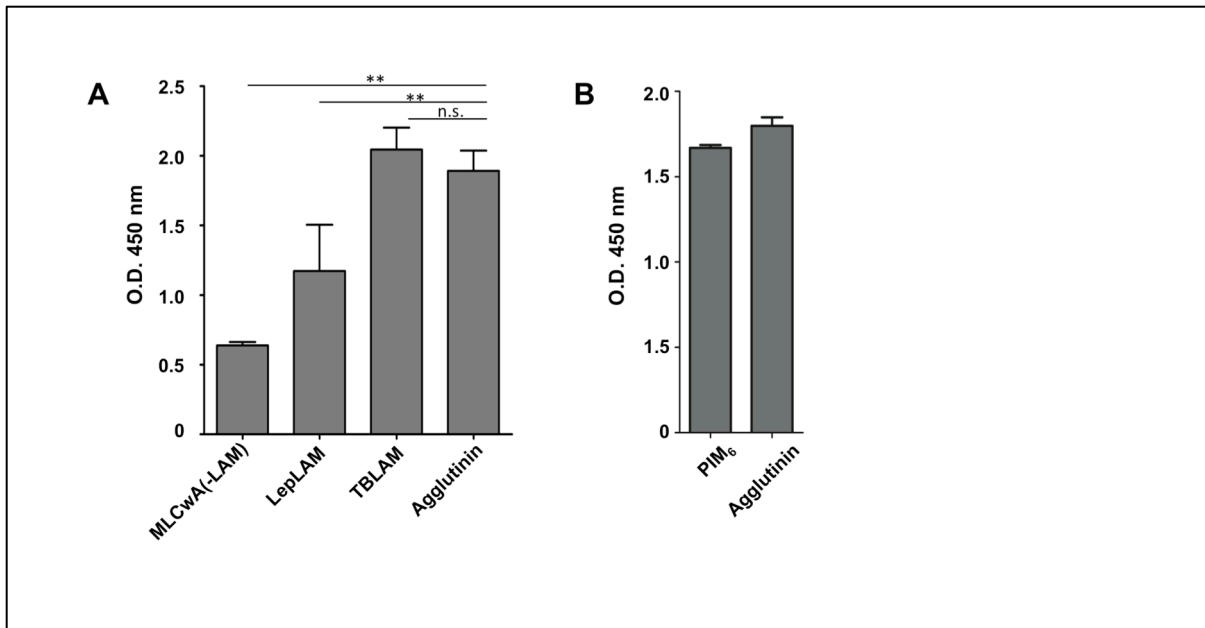

**Figure S3. Concanavaline A reactivity to mycobacterial ligands on microtiter plates.**

A) ConA reactivity to mycobacterial protein preparations and ManLAM by ligand ELISA. The ligands (0.05  $\mu\text{g}$  per well) with ConA (0.5  $\mu\text{g}/\text{ml}$ ) (n=8 independent assays). A one-way ANOVA combined with Tukey's multiple comparison analysis was performed to determine the statistical difference between each mycobacterial ligand and agglutinin. \*\*, p<0.01, \*, p<0.05.

B) ConA reactivity of PIM<sub>6</sub> by ligand ELISA (n=4 independent assays).



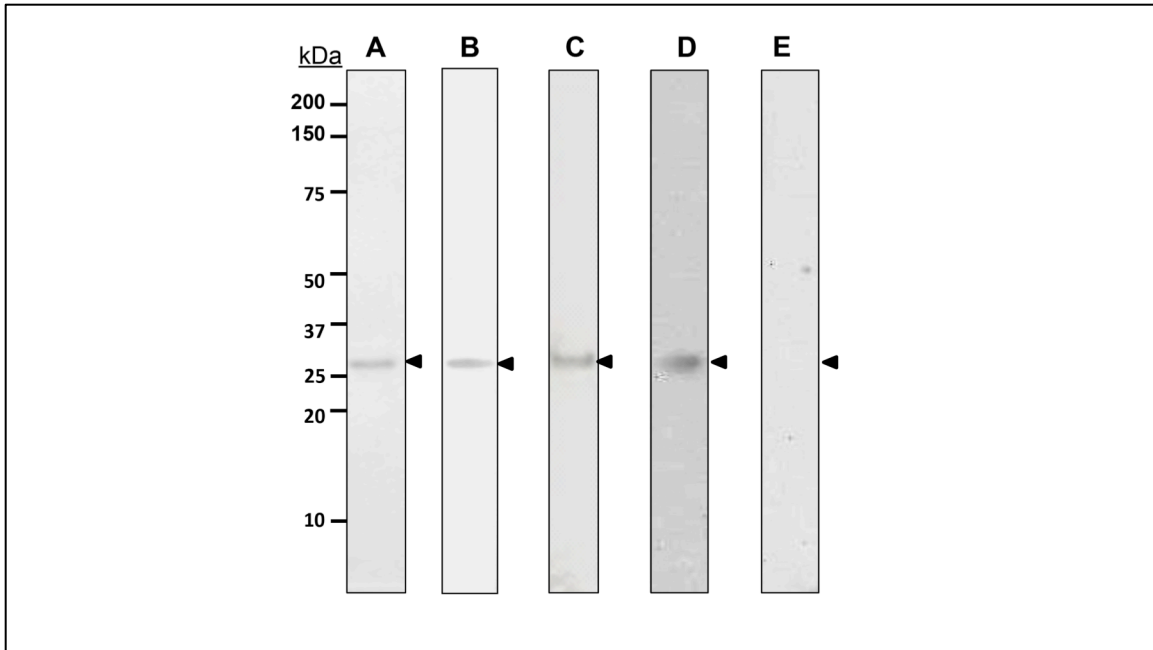

**Figure S4. Verification of lectin binding of glycosylated rSodC purified by preparative SDS-PAGE elution.** Final purified rSodC was resolved by SDS-PAGE and stained with Coomassie brilliant blue (A), transferred to nitrocellulose membrane and hybridized to anti His antibody (B) or PVDF probed ConA (C), r-langerin (D), or r-langerin in the presence of 300 mM methylmannoside (E). The arrowhead indicated the glycosylated rSodC. The data were reproduced in three individual experiments.
